# Supplementary material for: Genomic SELEX Reveals Pervasive Role of the Flagella Master Regulator FlhDC in Carbon Metabolism
Source: MDPI journal article supplement (doi:10.3390/ijms24043696), 2023-02-12
Supplement: s1 [file s1]

Table S1. Primers used in this study.

(A) For gel shift assay

| name        | sequence                        |
|-------------|---------------------------------|
| fliA-F      | GGTACCGCAGCAGGTTCTGTCTCTGCT     |
| fliA-R      | CTTCGTGACGCACCAGCGGGAC          |
| flgA/flgB-F | GATCGCCACGCTACGTTTTATTATCAGCAT  |
| flgA/flgB-R | GGCGGCGTCGAGCTTATCGAGCAT        |
| ptsH-F      | GCCGATCTCTTCACTGAGAAAGAATTGCAA  |
| ptsH-R      | AGCGGTAATGGTAACTTCTTGCTGGAACAT  |
| pfkA-F      | TTCCGGGATCGGATGTAATTATCCATCAGG  |
| pfkA-R      | CATCACCGCCGCTTGTC AACACA        |
| adhE/ychE-F | TTTACACGCTCTACGAGTGCGTTAAGTTCA  |
| adhE/ychE-R | GGTCTGAATCACGGTTAGCTCCGAAGC     |
| aceB-F      | CTACGGCACATGAATCCAACGCTGGATTAA  |
| aceB-R      | TTCATCGGTTGTTGTTGCCTGTT CAGTCAT |
| fruB/setB-F | ATGGATGTCCTGTACGGATAACTGGAACAT  |
| fruB/setB-R | GGAGACTGCGGGGGAGTTATGCAT        |
| epd-F       | CTGAAGAAGGCCGGTATCACTTCACAAGCT  |
| epd-R       | AAGCCATTTATCGCTACGCGTACGGTCAT   |
| iclR/metH-F | GTTTCGCGGGAATGGGTGCGACCAT       |
| iclR/metH-R | CACGCAGTTGTTCCACTTTGCTGCTCACAC  |
| yqjI/yqjH-F | GCGGGTAGCGGGGGGTGTTATTCAT       |
| yqjI/yqjH-R | TTTACAACACCCTTCGTGATGATGGCTCAT  |
| purH/rrsE-F | CGTTTGCGCAACGCTCGCG             |
| purH/rrsE-R | CTTCGAGTGCCACACAGATTGTCTG       |

(B) For Northern blot analysis

|        |                                     |
|--------|-------------------------------------|
| fliA-F | TGCGTCACGAAGCATTGCGCCTGC            |
| fliA-R | GGCTGTTATTGGTGTGCGAGCAACATTTGGCGA   |
| flgB-F | ATGCTCGATAAGCTCGACGCCGCCTTACG       |
| flgB-R | TGGTATTGCAGGCTGTTATCGGCAA ACTGG     |
| ptsH-F | ATGTTCCAGCAAGAAGTTACCATTAC          |
| ptsH-R | TTACTCGAGTTCCGCCATCAGTTTAA          |
| fruB-F | AGGCCGGAGACAAAGAAGAGGCGATT CG       |
| fruB-R | CTTCTGCTGTTGTTGCTGACTTCAGTTGTT CAGC |
| setB-F | TGACCTGACCTCGACGGCGTTTTTAATCGTTG    |
| setB-R | CAAGGGCAAACATTTGCGGGTTAGCGGT        |
| pfkA-F | AAATCGGTGTGTTGACAAGCGGCGGTGATG      |
| pfkA-R | GCACGGGAAGCCCATTTCCGGTCAGACG        |
| epd-F  | GGTCGCATCGGGCGTAATGTGGTTCGT         |
| epd-R  | TCGAGATCGTTACTGCCAGGATGTGAAAAGAGCAC |
| adhE-F | GTAGACAAAATCTTCCGCGCCGCCGCTC        |
| adhE-R | CGGGTGCGGGGAGAAGATAATGGCGTTACG      |
| aceB-F | GCGGTAGAATTTCTGACTGAGCTGGTGACGC     |
| aceB-R | GTGTA ACTGATGGTGCCGTTA ACCGCATCACG  |

|        |                                     |
|--------|-------------------------------------|
| iclR-F | ACTGGACAGGTTTCAGTCTTTAACGCGTGGC     |
| iclR-R | GCGTACACTGTACCTGGTCGATAATAATCGCTTCG |
| metH-F | GGTGCTGGACGGCGGTATGGGCA             |
| metH-R | CGAGAACACCGGCAACGTAGCGCGG           |
| yqjI-F | CATGAAGGCCAGCCACGCCATGAGG           |
| yqjI-R | CACTGCGCGCCTTGTTTCGGTCAG            |
| yqjH-F | GTTCGCAATGATCTGCGCTTCCGTGAACTG      |
| yqjH-R | GCGCGGACCTGCCACCGTAAGT              |

## DNA band patterns of genomic DNA fragments on PAGE

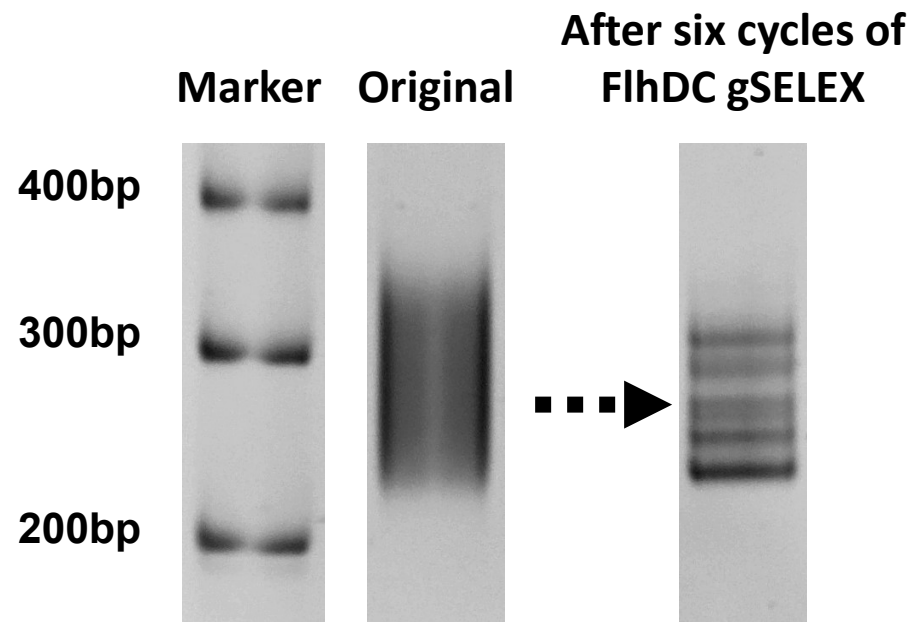

**Figure S1.** DNA band patterns of genomic DNA fragments. The SELEX cycle was repeated six times to enrich the FlhDC-binding sequences. The original DNA in gSELEX and the DNA after six cycles were each run on PAGE, and the DNA was stained with GelRed for observation.

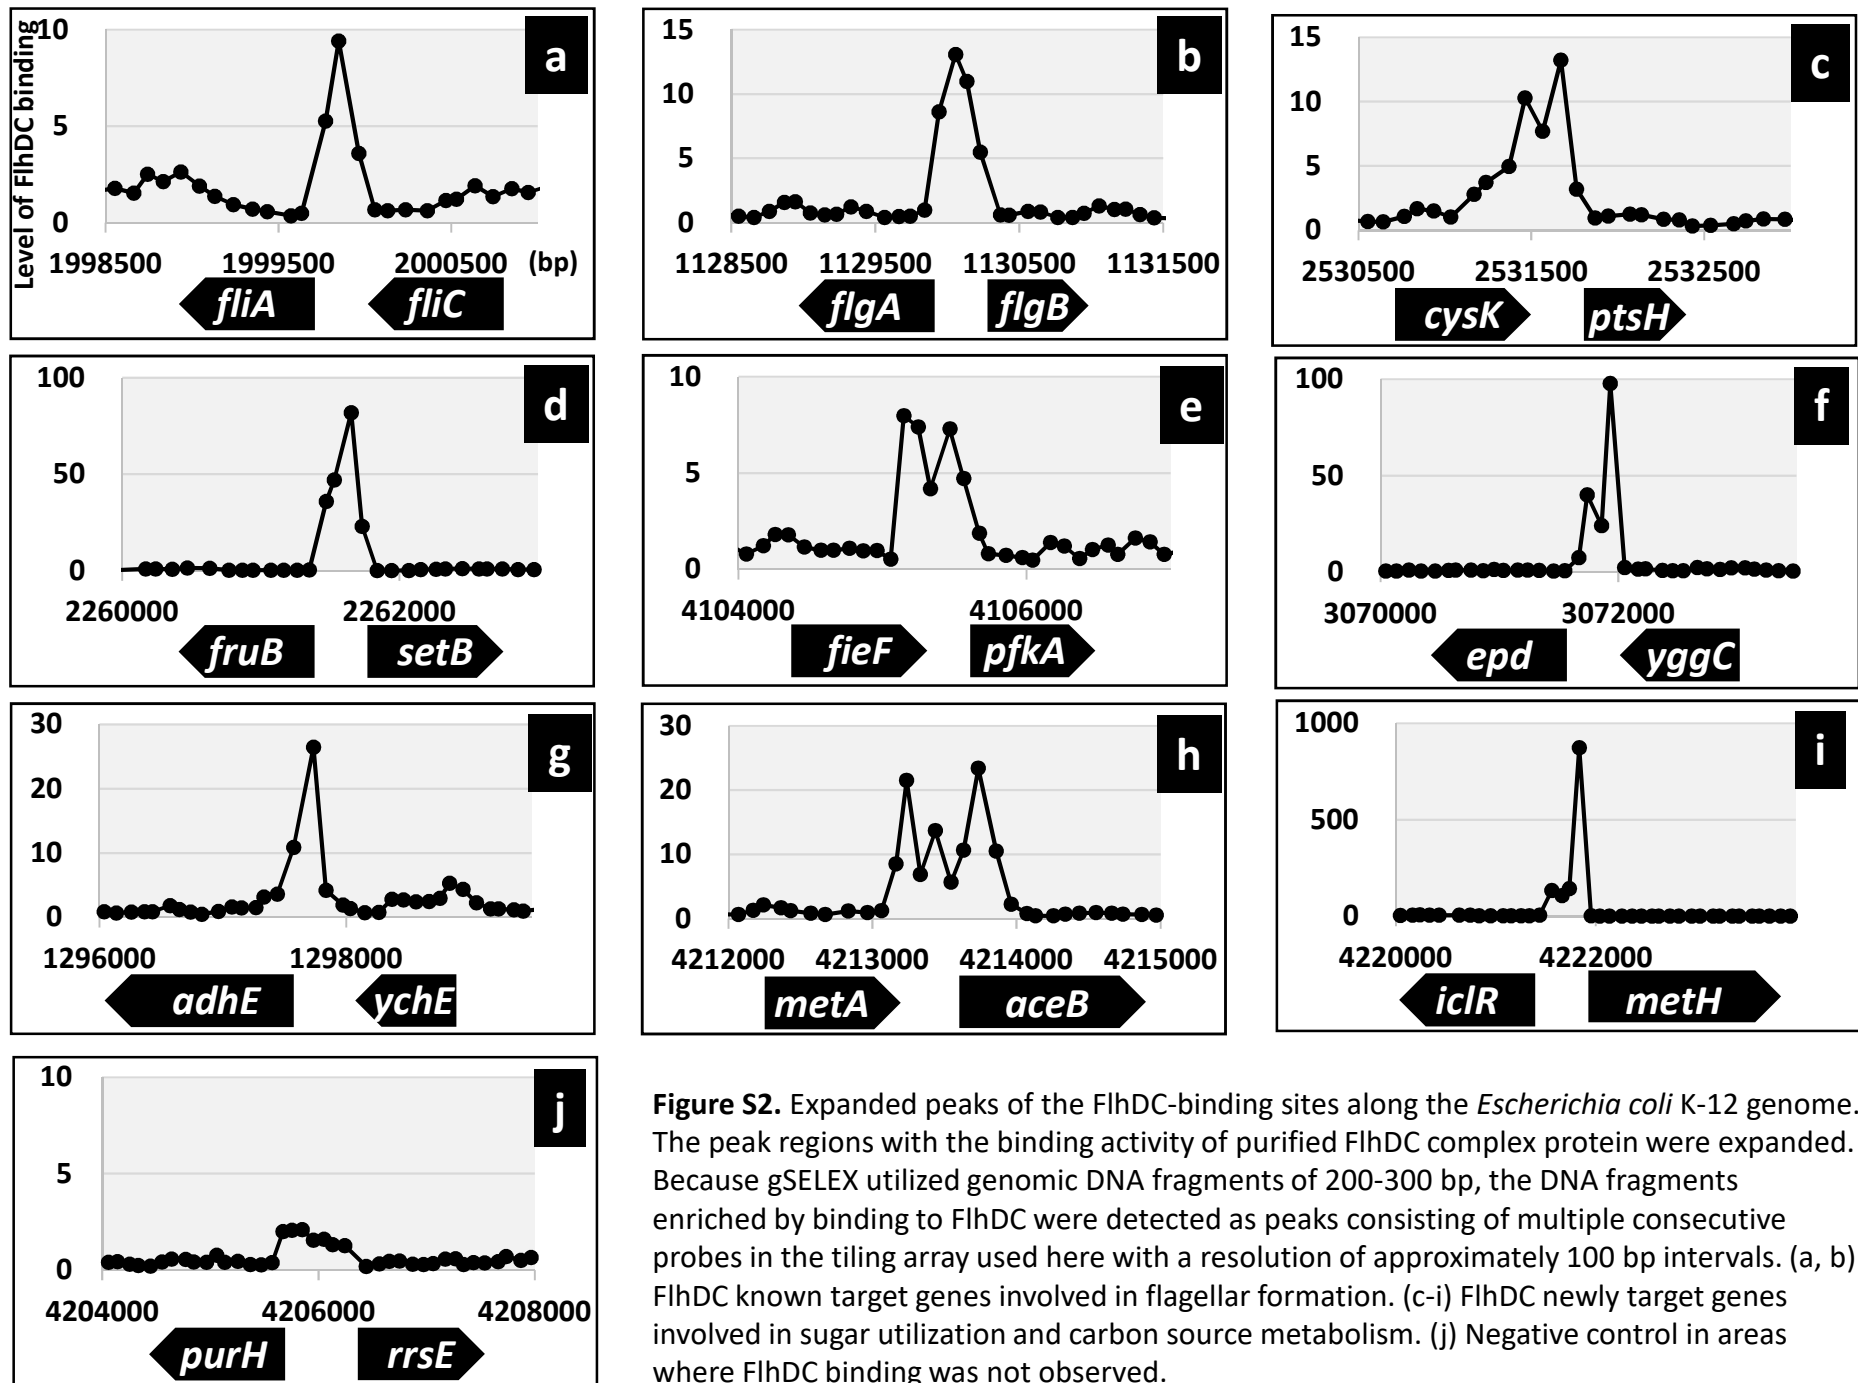

**Figure S2.** Expanded peaks of the FlhDC-binding sites along the *Escherichia coli* K-12 genome. The peak regions with the binding activity of purified FlhDC complex protein were expanded. Because gSELEX utilized genomic DNA fragments of 200-300 bp, the DNA fragments enriched by binding to FlhDC were detected as peaks consisting of multiple consecutive probes in the tiling array used here with a resolution of approximately 100 bp intervals. (a, b) FlhDC known target genes involved in flagellar formation. (c-i) FlhDC newly target genes involved in sugar utilization and carbon source metabolism. (j) Negative control in areas where FlhDC binding was not observed.
